# Supplementary material for: C781, a β-Arrestin Biased Antagonist at Protease-Activated Receptor-2 (PAR2), Displays in vivo Efficacy Against Protease-Induced Pain in Mice
Source: PubMed Central journal article supplement (PMC10079573; doi:10.1016/j.jpain.2022.11.006), 2022-11-20
Supplement: NIHMS1851843-supplement-1.pdf [file NIHMS1851843-supplement-1.pdf]

## Contents

|                                               |    |
|-----------------------------------------------|----|
| List of Tables .....                          | 3  |
| List of Figures .....                         | 4  |
| List of Abbreviations .....                   | 5  |
| Study Responsibilities.....                   | 6  |
| 1.0 Summary .....                             | 7  |
| 2.0 Study Objective.....                      | 9  |
| 3.0 Test Guidelines / SOPs / Compliance ..... | 9  |
| 4.0 Animal Welfare.....                       | 9  |
| 5.0 Experimental .....                        | 9  |
| 5.1 Test Compound .....                       | 9  |
| 5.2 Test System .....                         | 9  |
| 5.3 Study Design .....                        | 10 |
| 5.4 Formulation Preparation.....              | 10 |
| 5.4.1 Formulation Results .....               | 11 |
| 5.5 Observations .....                        | 11 |
| 5.6 Sample Collection .....                   | 11 |
| 5.7 Bioanalysis .....                         | 11 |
| 6.0 Data Analysis .....                       | 12 |
| 7.0 Results.....                              | 12 |
| 8.0 Data Archiving.....                       | 12 |
| 9.0 Annexure I .....                          | 17 |

**Sponsor:** UOT

**List of Tables**

Table 1: Plasma pharmacokinetic parameters of Compound-781 following a single intraperitoneal dose administration to female C57BL/6 mice (Dose: 10 and 30 mg/kg) .. 13

Table 2: Individual plasma concentration-time data of Compound-781 following a single intraperitoneal administration to female C57BL/6 mice (Dose: 10 mg/kg) ..... 14

Table 3: Individual plasma concentration-time data of Compound-781 following a single intraperitoneal administration to female C57BL/6 mice (Dose: 30 mg/kg) ..... 14

Table 4: Mean brain-to-plasma concentration ratio of Compound-781 following a single intraperitoneal administration to female C57BL/6 mice (Dose: 10 and 30 mg/kg) ..... 15

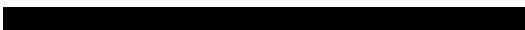

**Sponsor:** UOT

**List of Figures**

Figure 1: Mean plasma concentration-time profiles of Compound-781 following a single intraperitoneal dose administration to female C57BL/6 mice (Dose: 10 and 30 mg/kg) .. 16

Sponsor: UOT

**List of Abbreviations**

---

|                        |                                                                                |
|------------------------|--------------------------------------------------------------------------------|
| <b>LLOQ</b>            | Lower Limit of Quantitation                                                    |
| <b>CPCSEA</b>          | Committee for the Purpose of Control and Supervision of Experiments on Animals |
| <b>CV</b>              | Coefficient of Variation                                                       |
| <b>IAEC</b>            | Institutional Animal Ethics Committee                                          |
| <b>IS</b>              | Internal Standard                                                              |
| <b>LC-MS/MS</b>        | Liquid Chromatography Mass Spectrometry                                        |
| <b>NA</b>              | Not Applicable                                                                 |
| <b>IP</b>              | Intraperitoneal                                                                |
| <b>SD</b>              | Standard Deviation                                                             |
| <b>SOP</b>             | Standard Operating Procedure                                                   |
| <b>C<sub>max</sub></b> | Maximum concentration                                                          |
| <b>T<sub>max</sub></b> | Time to reach maximum concentration                                            |
| <b>AUC</b>             | Area under Plasma concentration - Time curve                                   |

---

Sponsor: UOT

**Study Responsibilities**

|                                                  |                                                                                                                                                                   |
|--------------------------------------------------|-------------------------------------------------------------------------------------------------------------------------------------------------------------------|
| <b>Study Director :</b>                          | Aslam Burhan, Ph.D.                                                                                                                                               |
| <b>Formulation:</b>                              | Anandkumar Yadav, M. Pharm.                                                                                                                                       |
| <b>In-Life Phase:</b>                            | Mahesh Rahinj, M. Pharm.<br>Amol S. Rasal, M. Pharm.<br>Nilkanth Naik, M. Pharm.<br>Anandkumar Yadav, M. Pharm.<br>Suraj Lanke, M. Pharm.<br>Sanjay Bedare, M. S. |
| <b>Bioanalysis:</b>                              | Srikant Jadhav, M. Pharm.                                                                                                                                         |
| <b>Data Analysis and Report<br/>Prepared By:</b> | Nilkanth Naik, M. Pharm.                                                                                                                                          |
| <b>QC By:</b>                                    | Sapana Chavan, M.Sc.                                                                                                                                              |
| <b>Report Reviewed By:</b>                       | Aslam Burhan, Ph.D.                                                                                                                                               |

Sponsor: UOT

## 1.0 Summary

The objective of this study was to investigate the plasma pharmacokinetics and brain distribution of Compound-781 following single intraperitoneal dose administration in female C57BL/6 mice at 10 and 30 mg/kg dose. A group of twelve female mice were divided into two groups as:

Group 1; 10 mg/kg/IP; (n = 6; Animal # 1-6),

Group 2; 30 mg/kg/IP; (n = 6; Animal # 7-12).

Animals in Group 1 and Group 2 were administered intraperitoneally with Compound-781 solution formulation in normal saline at 10 and 30 mg/kg dose respectively.

Blood samples (approximately 60  $\mu$ L) were collected under light isoflurane anesthesia from retro orbital plexus such that samples were obtained at 0.08, 0.5, 1, 2, 4 and 8 hr (IP). At each time point blood samples were collected from three mice. Immediately after collection, plasma was harvested by centrifugation and stored at -70°C until analysis..

Immediately after collection of blood, animals were euthanized with excess CO<sub>2</sub> asphyxiation. Brain samples were collected from mice at 4 and 8 hr from respective animal. Brain samples were homogenized using ice-cold phosphate buffer saline (pH-7.4). Total homogenate volume was three times the brain weight.

All samples were processed for analysis by protein precipitation using acetonitrile and analyzed with fit-for-purpose LC/MS/MS method (LLOQ = 1.01 ng/mL for plasma, 3.03 ng/g for brain).

Pharmacokinetic parameters were calculated using the non-compartmental analysis tool of Phoenix WinNonlin (Version 7.0). The overall pharmacokinetic parameters are summarized below:

| Matrix | Route | Dose (mg/kg) | T <sub>max</sub> (hr) | C <sub>max</sub> (ng/mL) | AUC <sub>last</sub> (hr*ng/mL) | AUC <sub>inf</sub> (hr*ng/mL) |
|--------|-------|--------------|-----------------------|--------------------------|--------------------------------|-------------------------------|
| Plasma | IP    | 10           | 0.08                  | 10417.78                 | 6472.28                        | 6544.75                       |
|        |       | 30           | 0.50                  | 10199.77                 | 7605.39                        | 7668.28                       |

**10 mg/kg/IP:** Following a single intraperitoneal dose administration of Compound-781 at 10 mg/kg to female C57BL/6 mice, the plasma concentrations were observed up to 8 hr with T<sub>max</sub> at 0.08 hr. Brain concentrations were quantifiable at 4 and 8 hr, Brain-to-plasma ratio were 0.23 (4 hr) and 0.34 (8 hr).

**Sponsor:** UOT

**30 mg/kg/IP:** Following a single intraperitoneal dose administration of Compound-781 at 30 mg/kg to female C57BL/6 mice, the plasma concentrations were observed up to 8 hr with  $T_{max}$  at 0.5 hr. Brain concentrations were quantifiable at 4 and 8 hr, Brain-to-plasma ratio were 0.09 (4 hr) and 1.65 (8 hr).



Sponsor: UOT

## 2.0 Study Objective

To investigate the plasma pharmacokinetics and brain distribution of Compound-781 following single intraperitoneal dose administration in female C57BL/6 mice at 10 and 30 mg/kg dose..

## 3.0 Test Guidelines / SOPs / Compliance

The study was conducted at Sai Life Sciences Limited, Pune, India, in accordance with the Study Plan SAIDMPK/PK-19-10-849.

This study was performed with approval of Institutional Animal Ethics Committee (IAEC) in accordance with requirement of The Committee for the Purpose of Control and Supervision of Experiments on Animals (CPCSEA), India. The study was not performed as per GLP regulations and not audited by QA; however all appropriate documentation is maintained in study file. Study phases, data generated and the report have been verified for the accuracy by the study group.

## 4.0 Animal Welfare

All procedures of the present study were in accordance with the guidelines provided by the Committee for the Purpose of Control and Supervision of Experiments on Animals (CPCSEA) as published in The Gazette of India, December 15, 1998. Prior approval of the Institutional Animal Ethics Committee (IAEC) was obtained before initiation of the study.

## 5.0 Experimental

### 5.1 Test Compound

The test compound Compound-781 (Mol. Wt: 515.30, Purity: 98.142%) was received from Sponsor.

### 5.2 Test System

Healthy female C57BL/6 mice (8-12 weeks old) weighing between 20 to 35 g were procured from ACTREC, India. Three mice were housed in each cage. Temperature and humidity were maintained at  $22 \pm 3$  °C and 30-70%, respectively and illumination was controlled to give a sequence of 12 hr light and 12 hr dark cycle. Temperature and humidity were recorded by auto-controlled data logger system. All

Sponsor: UOT

the animals were provided laboratory rodent diet (Envigo Research private Ltd, Hyderabad). Reverse osmosis water treated with ultraviolet light was provided *ad libitum*.

### 5.3 Study Design

A group of twelve female mice were divided into two groups as:

Group 1; 10 mg/kg/IP; (n = 6; Animal # 1-6),

Group 2; 30 mg/kg/IP; (n = 6; Animal # 7-12).

Animals in Group 1 and Group 2 were administered intraperitoneally with Compound-781 solution formulation in normal saline at 10 and 30 mg/kg dose respectively.

The dosing volume administered was 10 mL/kg. The assignment of animals was shown in the table below:

| Group | Route | Dose (mg/kg) | Animal ID |
|-------|-------|--------------|-----------|
| 1     | IP    | 10           | 6 (1- 6)  |
| 2     | IP    | 30           | 6 (7-12)  |

### 5.4 Formulation Preparation

The strengths of intraperitoneal solution formulations were 1 mg/mL and 3 mg/mL.

| Ingredients          | IP (1 mg/mL) | IP (3 mg/mL) |
|----------------------|--------------|--------------|
| Compound-781         | 2.30 mg      | 6.73 mg      |
| Normal saline (100%) | 2.257 mL     | 2.201 mL     |

**1 mg/mL:** Accurately weighed quantity 2.30 mg of Compound-781 for IP dosing was added in a labeled bottle. The volume 2.257 mL of normal saline was added. The formulation was vortexed for 2 minutes to get clear solution.

**3 mg/mL:** Accurately weighed quantity 6.73 mg of Compound-781 for IP dosing was added in a labeled bottle. The volume 2.201 mL of normal saline was added. The formulation was vortexed for 2 minutes to get clear solution.

Sponsor: UOT

### 5.4.1 Formulation Results

After preparation of formulations, a volume of 200  $\mu$ L was aliquoted for analysis. The formulations were analyzed and found to be within the acceptance criteria (in-house acceptance criteria is  $\pm$  20% from the nominal value). Formulations were prepared freshly prior to dosing.

| Compound     | Formulation | Theoretical Conc.<br>(mg/mL) | Conc. Found<br>(mg/mL) | %<br>Change |
|--------------|-------------|------------------------------|------------------------|-------------|
| Compound-781 | IP          | 1.00                         | 0.99                   | -1.00       |
|              |             | 3.00                         | 2.97                   | -1.00       |

### 5.5 Observations

All the animals were found to be normal without showing any clinical signs after intraperitoneal dose administration at 10 and 30 mg/kg dose.

### 5.6 Sample Collection

**Blood:** Blood samples (approximately 60  $\mu$ L) were collected under light isoflurane anesthesia from retro orbital plexus such that samples were obtained at 0.08, 0.5, 1, 2, 4 and 8 hr (IP). At each time point blood samples were collected from three mice. Immediately after collection, plasma was harvested by centrifugation and stored at -70°C until analysis..

**Brain:** Immediately after collection of blood, animals were euthanized with excess CO<sub>2</sub> asphyxiation. Brain samples were collected from mice at 4 and 8 hr from respective animal. Brain samples were homogenized using ice-cold phosphate buffer saline (pH-7.4). Total homogenate volume was three times the brain weight.

### 5.7 Bioanalysis

Concentrations of Compound-781 in mouse plasma and brain samples were determined by fit for purpose LC-MS/MS method. The sample processing and extraction procedure, chromatographic and mass spectrometric conditions were presented in Annexure I.

Sponsor: UOT

## 6.0 Data Analysis

Non-compartmental analysis module in Phoenix WinNonlin® (Version 7.0) was used to assess the pharmacokinetic parameters. Maximum concentration ( $C_{max}$ ) and time to reach maximum concentration ( $T_{max}$ ) were the observed values. The areas under the concentration time curve ( $AUC_{last}$  and  $AUC_{inf}$ ) and elimination half-life was calculated by linear trapezoidal rule. The terminal elimination rate constant,  $k_e$  was determined by regression analysis of the linear terminal portion of the log plasma concentration-time curve.

## 7.0 Results

**10 mg/kg/IP:** Following a single intraperitoneal dose administration of Compound-781 at 10 mg/kg to female C57BL/6 mice, the plasma concentrations were observed up to 8 hr with  $T_{max}$  at 0.08 hr. Brain concentrations were quantifiable at 4 and 8 hr, Brain-to-plasma ratio were 0.23 (4 hr) and 0.34 (8 hr).

**30 mg/kg/IP:** Following a single intraperitoneal dose administration of Compound-781 at 30 mg/kg to female C57BL/6 mice, the plasma concentrations were observed up to 8 hr with  $T_{max}$  at 0.5 hr. Brain concentrations were quantifiable at 4 and 8 hr, Brain-to-plasma ratio were 0.09 (4 hr) and 1.65 (8 hr).

## 8.0 Data Archiving

All raw data, study protocol, and final report were documented and will be archived. The materials (hard and soft copies) will be retained for 1 year from the date of approval of final report. Thereafter, the archived material will be destroyed or stored for extended period as per written consent from the sponsor.

Sponsor: UOT

**Table 1: Plasma pharmacokinetic parameters of Compound-781 following a single intraperitoneal dose administration to female C57BL/6 mice (Dose: 10 and 30 mg/kg)**

| Matrix | Route | Dose (mg/kg) | T <sub>max</sub> (hr) | C <sub>max</sub> (ng/mL) | AUC <sub>last</sub> (hr*ng/mL) | AUC <sub>inf</sub> (hr*ng/mL) |
|--------|-------|--------------|-----------------------|--------------------------|--------------------------------|-------------------------------|
| Plasma | IP    | 10           | 0.08                  | 10417.78                 | 6472.28                        | 6544.75                       |
|        |       | 30           | 0.50                  | 10199.77                 | 7605.39                        | 7668.28                       |

Sponsor: UOT

**Table 2: Individual plasma concentration-time data of Compound-781 following a single intraperitoneal administration to female C57BL/6 mice (Dose: 10 mg/kg)**

| Animal ID   | Plasma concentration (ng/mL) |                |               |               |               |              |
|-------------|------------------------------|----------------|---------------|---------------|---------------|--------------|
|             | Time (hr)                    |                |               |               |               |              |
|             | 0.08                         | 0.5            | 1             | 2             | 4             | 8            |
| 1           | 10589.02                     |                | 794.46        |               | 114.67        |              |
| 2           | 9856.35                      |                | 872.61        |               | 110.18        |              |
| 3           | 10807.96                     |                | 925.12        |               | 116.76        |              |
| 4           |                              | 4501.08        |               | 451.49        |               | 33.94        |
| 5           |                              | 4606.27        |               | 495.97        |               | 29.20        |
| 6           |                              | 4695.43        |               | 440.65        |               | 38.41        |
| <b>Mean</b> | <b>10417.78</b>              | <b>4600.93</b> | <b>864.06</b> | <b>462.70</b> | <b>113.87</b> | <b>33.85</b> |
| SD          | 498.38                       | 97.29          | 65.75         | 29.32         | 3.36          | 4.61         |
| CV%         | 4.78                         | 2.11           | 7.61          | 6.34          | 2.95          | 13.61        |

LLOQ = 1.01 ng/mL

**Table 3: Individual plasma concentration-time data of Compound-781 following a single intraperitoneal administration to female C57BL/6 mice (Dose: 30 mg/kg)**

| Animal ID   | Plasma concentration (ng/mL) |                 |                |               |              |              |
|-------------|------------------------------|-----------------|----------------|---------------|--------------|--------------|
|             | Time (hr)                    |                 |                |               |              |              |
|             | 0.08                         | 0.5             | 1              | 2             | 4            | 8            |
| 7           | 5498.47                      |                 | 1448.07        |               | 61.97        |              |
| 8           | 6332.45                      |                 | 1432.99        |               | 61.15        |              |
| 9           | 4200.02                      |                 | 1363.87        |               | 58.90        |              |
| 10          |                              | 10008.26        |                | 213.05        |              | 22.95        |
| 11          |                              | 10120.41        |                | 189.31        |              | 21.80        |
| 12          |                              | 10470.64        |                | 173.31        |              | 24.99        |
| <b>Mean</b> | <b>5343.65</b>               | <b>10199.77</b> | <b>1414.98</b> | <b>191.89</b> | <b>60.67</b> | <b>23.25</b> |
| SD          | 1074.61                      | 241.19          | 44.90          | 20.00         | 1.59         | 1.62         |
| CV%         | 20.11                        | 2.36            | 3.17           | 10.42         | 2.62         | 6.95         |

LLOQ = 1.01 ng/mL

Sponsor: UOT

**Table 4: Mean brain-to-plasma concentration ratio of Compound-781 following a single intraperitoneal administration to female C57BL/6 mice (Dose: 10 and 30 mg/kg)**

| Dose (mg/kg) | Time (hr) | Animal ID | Plasma concentration (ng/mL) | Brain concentration (ng/g) | Brain-to-Plasma Ratio | Mean Ratio        |
|--------------|-----------|-----------|------------------------------|----------------------------|-----------------------|-------------------|
| 10           | 4         | 1         | 114.67                       | 30.93                      | 0.27                  | 0.23              |
|              |           | 2         | 110.18                       | 16.59                      | 0.15                  |                   |
|              |           | 3         | 116.76                       | 32.25                      | 0.28                  |                   |
|              | 8         | 4         | 33.94                        | 11.82                      | 0.35                  | 0.34              |
|              |           | 5         | 29.20                        | 13.08                      | 0.45                  |                   |
|              |           | 6         | 38.41                        | 8.49                       | 0.22                  |                   |
| 30           | 4         | 7         | 61.97                        | 0.00                       | NA                    | 0.09 <sup>c</sup> |
|              |           | 8         | 61.15                        | 5.64                       | 0.09                  |                   |
|              |           | 9         | 58.90                        | 0.00                       | NA                    |                   |
|              | 8         | 10        | 22.95                        | 36.24                      | 1.58                  | 1.65              |
|              |           | 11        | 21.80                        | 52.23                      | 2.40                  |                   |
|              |           | 12        | 24.99                        | 24.51                      | 0.98                  |                   |

LLOQ = 3.03 ng/g for brain and 1.01 ng/mL for plasma, NA – Not applicable, c – Single value reported

Sponsor: UOT

**Figure 1: Mean plasma concentration-time profiles of Compound-781 following a single intraperitoneal dose administration to female C57BL/6 mice (Dose: 10 and 30 mg/kg)**

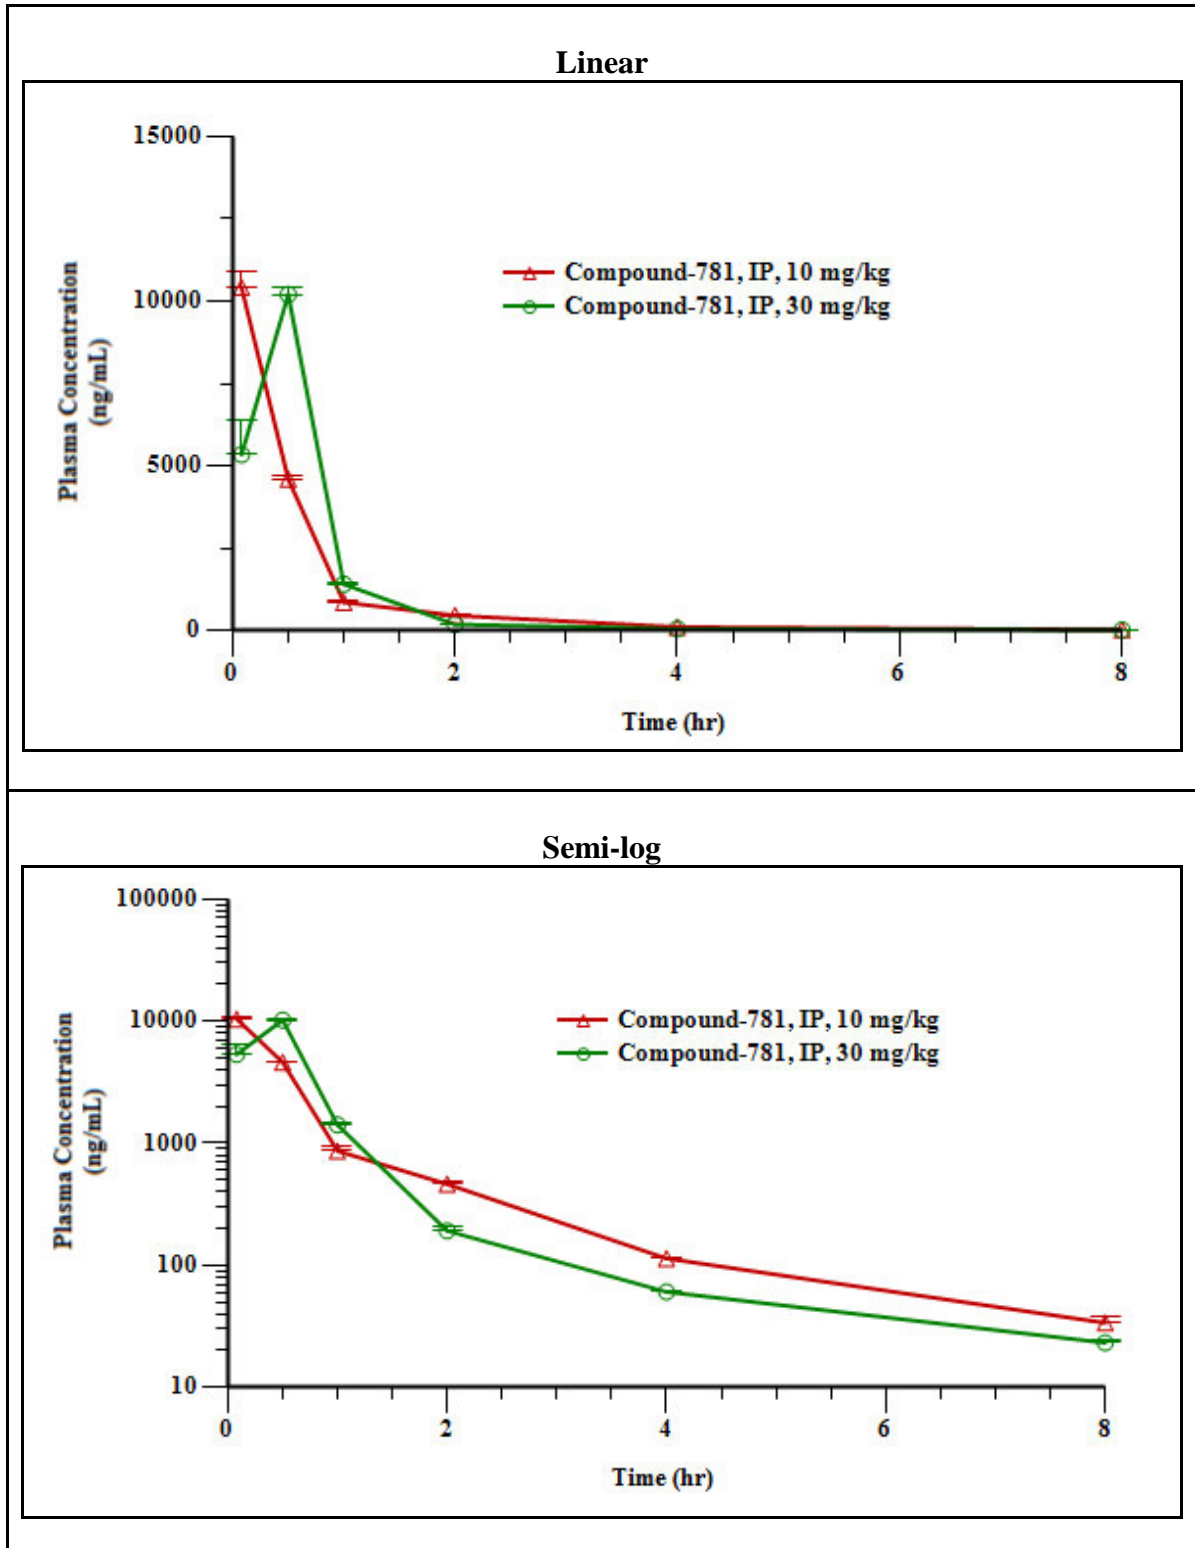



Sponsor: UOT

## 9.0 Annexure I

## Bioanalytical Summary

## LC Conditions:

**Mobile Phase A:** 0.1% Formic acid in Acetonitrile**B:** 10 Mm Ammonium Formate**Column** : Accucore Phnyl X, 2.6 $\mu$ m, 50 X 2.1 mm**Injection Volume ( $\mu$ L)** : 1**Column Oven Temperature ( $^{\circ}$ C)** : 45**Retention Time (in min)** : **Analyte:** Compound-781 : 0.95

IS: Glipizide: 1.05

## LC Gradient Used

| Time (Minutes) | Flow Rate (mL/min) | PUMP A (% Conc) | PUMP B (% Conc) |
|----------------|--------------------|-----------------|-----------------|
| Initial        | 0.7                | 0               | 100             |
| 0.30           | 0.7                | 0               | 100             |
| 0.50           | 0.7                | 95              | 5               |
| 1.30           | 0.7                | 95              | 5               |
| 1.40           | 0.7                | 0               | 100             |
| 1.80           | 0.7                | 0               | 100             |

## Mass Conditions

## MRM Transitions:

| Analyte ID / IS ID | Q1    | Q3    | DP  | CE | CXP | Dwell time (msec) |
|--------------------|-------|-------|-----|----|-----|-------------------|
| COMPOUND-781 252   | 516.4 | 252.2 | 108 | 37 | 18  | 50                |
| Glipizide          | 446.3 | 347.0 | 40  | 22 | 12  | 50                |

## Source Parameter:

|                   |          |
|-------------------|----------|
| Polarity          | Positive |
| CAD               | 8        |
| CUR               | 25       |
| GS1               | 40       |
| GS2               | 60       |
| Ion Spray Voltage | 5500     |
| Temperature       | 550      |
| Interface Heater  | ON       |
| EP                | 10       |

Sponsor: UOT

**Extraction Procedure:**

The extraction procedure for plasma/brain samples and the spiked plasma/brain calibration standards were identical:

A 25 µL of study sample or spiked plasma/brain calibration standard was added to individual pre-labeled micro-centrifuge tubes followed by 100 µL of internal standard prepared in Acetonitrile (Glipizide, 500 ng/mL) was added except for blank, where 100 µL of Acetonitrile was added. Samples were vortexed for 5 minutes. Samples were centrifuged for 10 minutes at a speed of 4000 rpm at 4 °C. Following centrifugation, 100 µL of clear supernatant was transferred in 96 well plates and analyzed using LC-MS/MS.

**Representative Chromatograms**

Representative chromatogram of blank mice plasma in the LC-MS/MS analysis of COMPOUND-781

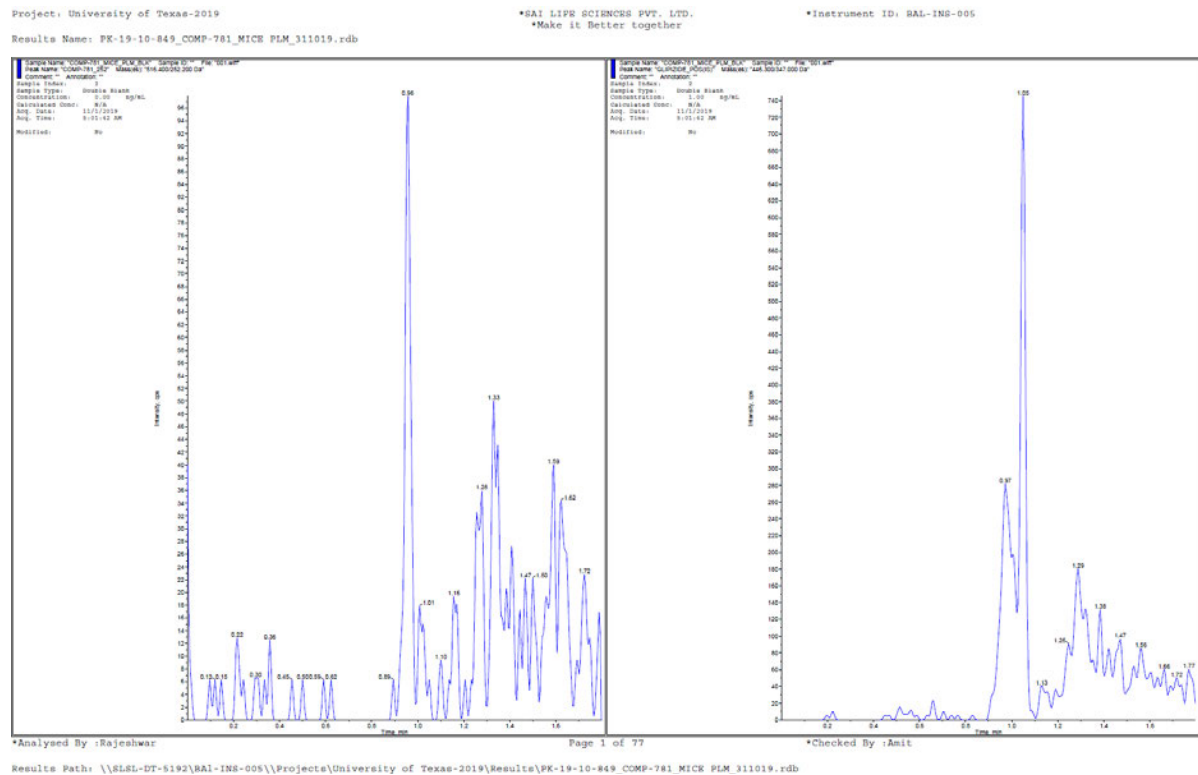

Sponsor: UOT

Representative LC-MS/MS chromatogram of COMPOUND-781 LLOQ standard and Glipizide (IS) in mice plasma

Project: University of Texas-2019

\*SAL LIPR SCIENCES PVT. LTD.  
\*Make it Better together

\*Instrument ID: SAL-INS-005

Results Name: PK-19-10-849\_COMP-781\_MICK\_PLM\_311019.rdb

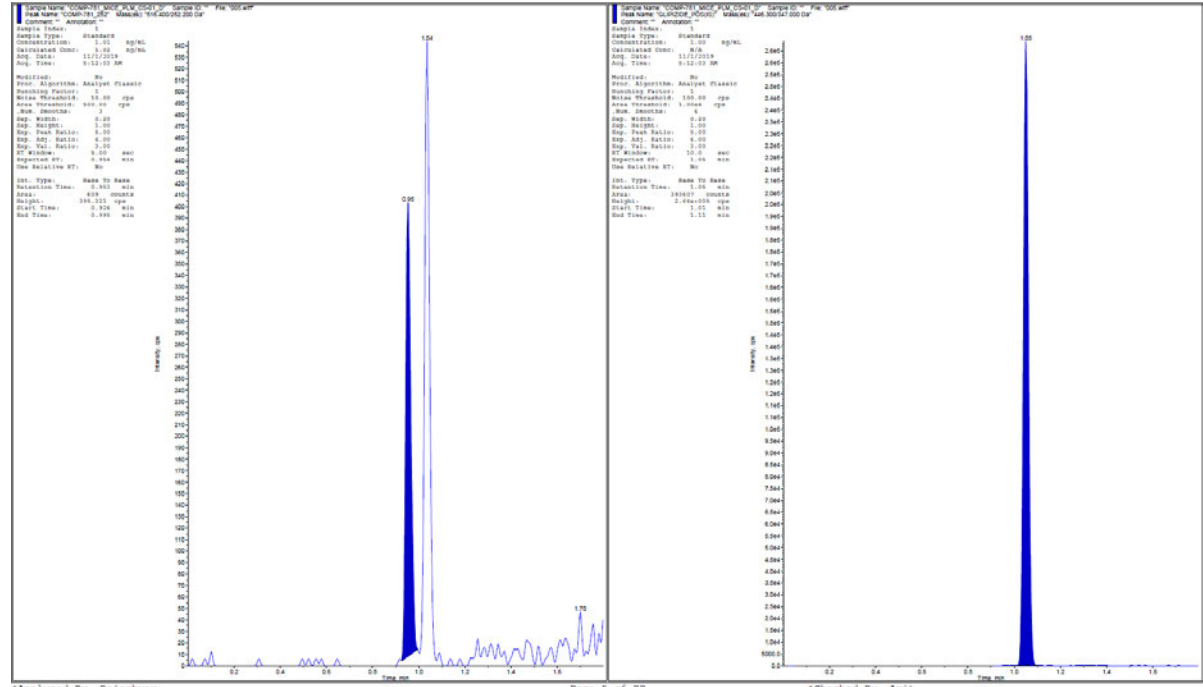

Results Path: \\SLSL-DT-5192\SAL-INS-005\Projects\University of Texas-2019\Results\PK-19-10-849\_COMP-781\_MICK\_PLM\_311019.rdb

Representative LC-MS/MS chromatogram of COMPOUND-781 ULOQ standard and Glipizide (IS) in mice plasma

Project: University of Texas-2019

\*SAL LIPR SCIENCES PVT. LTD.  
\*Make it Better together

\*Instrument ID: SAL-INS-005

Results Name: PK-19-10-849\_COMP-781\_MICK\_PLM\_311019.rdb

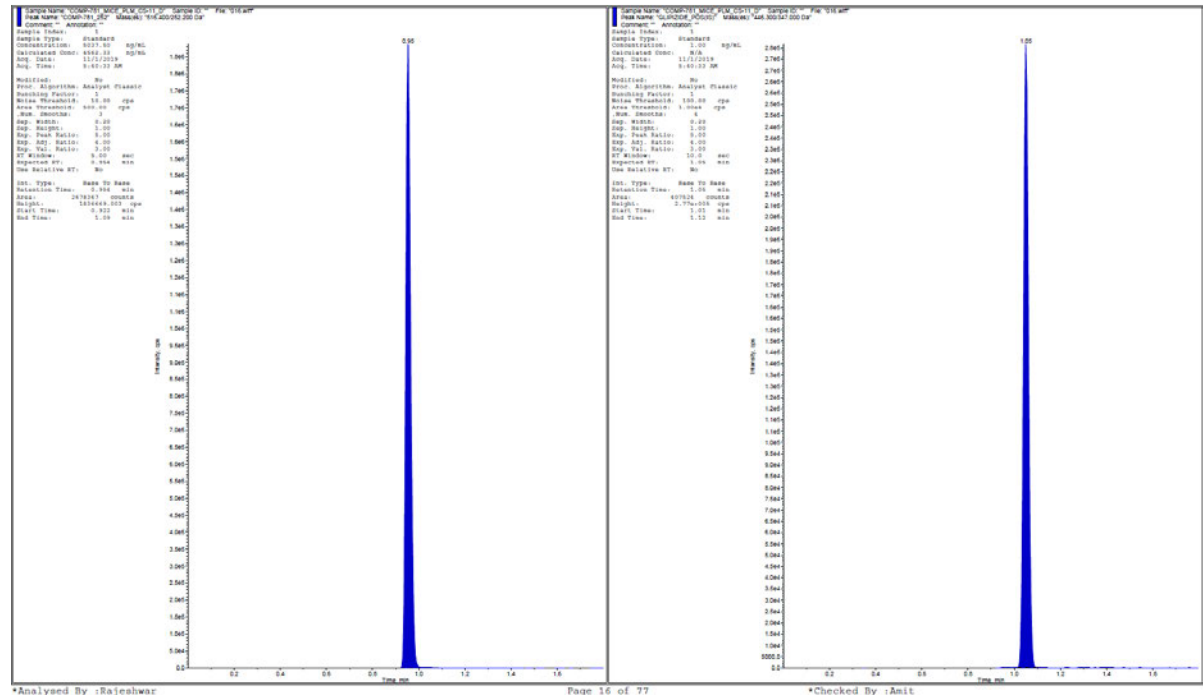

Results Path: \\SLSL-DT-5192\SAL-INS-005\Projects\University of Texas-2019\Results\PK-19-10-849\_COMP-781\_MICK\_PLM\_311019.rdb

Sponsor: UOT

Representative LC-MS/MS chromatogram of COMPOUND-781 study sample (plasma) and Glipizide (IS)

Project: University of Texas-2019

\*SAL LIFE SCIENCES PVT. LTD.  
\*Make it Better together

\*Instrument ID: SAL-INS-005

Results Name: PK-19-10-849\_COMP-781\_MICE PLM\_311019.rdb

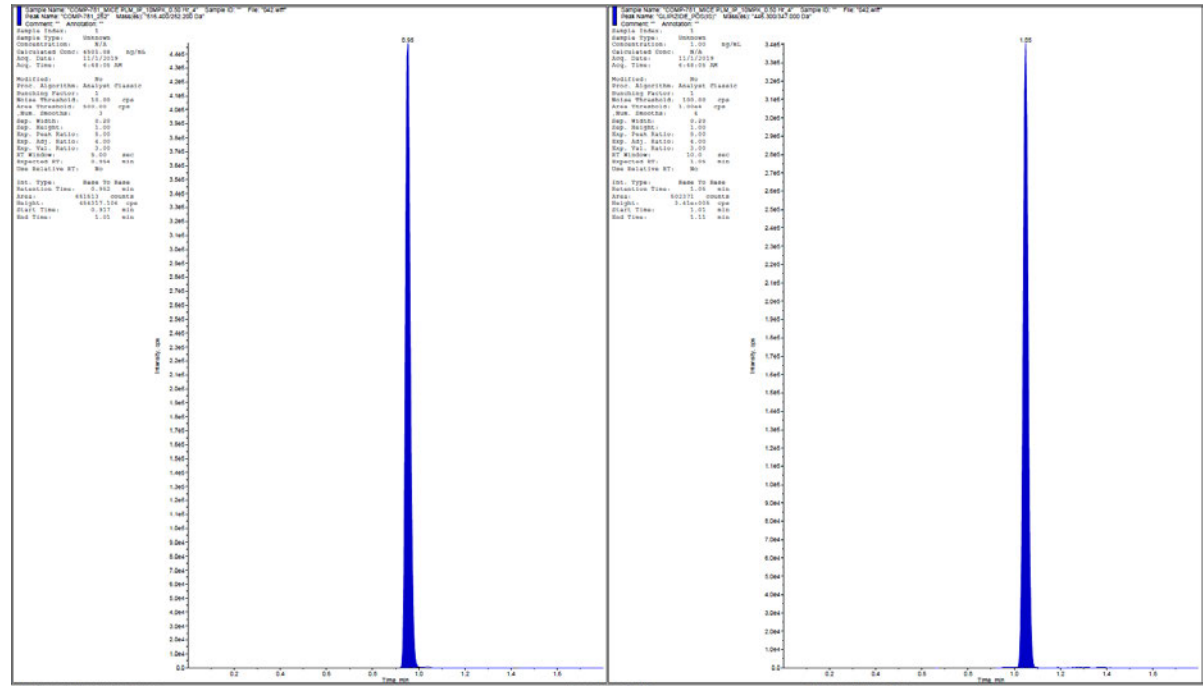

Results Path: \\SLSL-DT-5192\SAL-INS-005\Projects\University of Texas-2019\Results\PK-19-10-849\_COMP-781\_MICE PLM\_311019.rdb

Calibration curve of COMPOUND-781 in mice plasma

Project: University of Texas-2019

\*SAL LIFE SCIENCES PVT. LTD.  
\*Make it Better together

\*Instrument ID: SAL-INS-005

Results Name: PK-19-10-849\_COMP-781\_MICE PLM\_311019.rdb

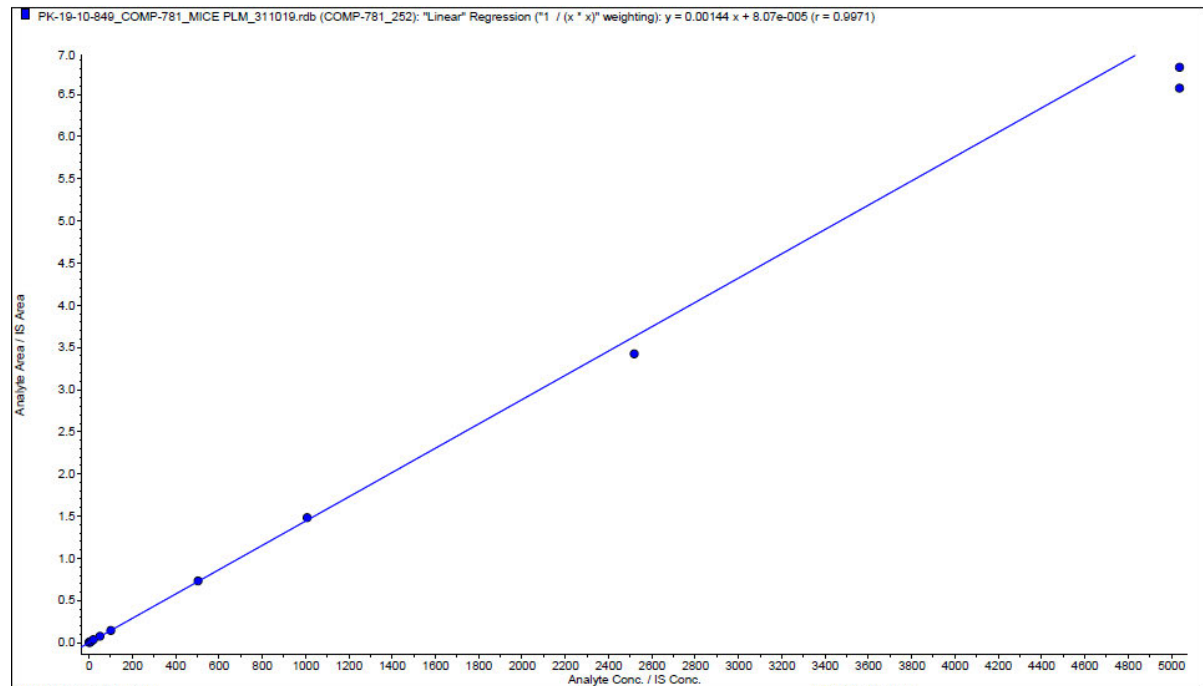

Results Path: \\SLSL-DT-5192\SAL-INS-005\Projects\University of Texas-2019\Results\PK-19-10-849\_COMP-781\_MICE PLM\_311019.rdb

Sponsor: UOT

Calibration curve of COMPOUND-781 in mice brain

Project: University of Texas-2019

\*SAI LIFE SCIENCES PVT. LTD.

\*Instrument ID: BAL-INS-005

Results Name: PK-19-10-849\_COMP-781\_MICE BRAIN\_311019.rdb

\*Make it Better together

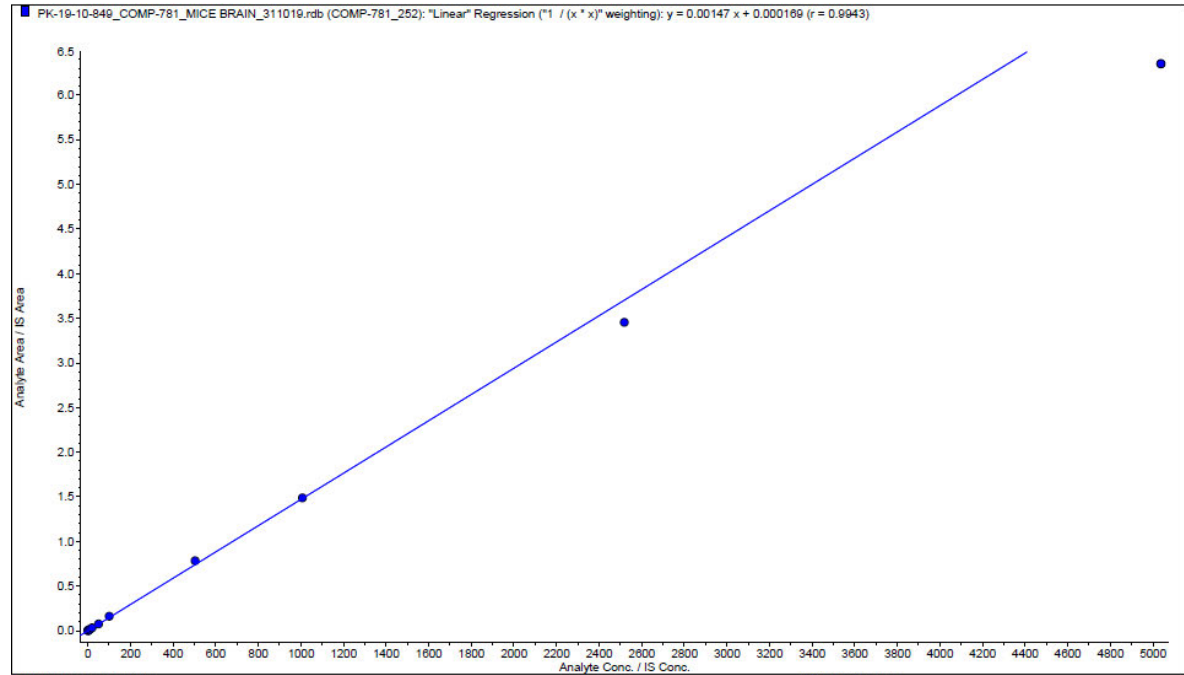

\*Analysed By: Rajeshwar

Page 1 of 1

\*Checked By: Amit

Results Path: \\SLSL-DT-5192\BAL-INS-005\Projects\University of Texas-2019\Results\PK-19-10-849\_COMP-781\_MICE BRAIN\_311019.rdb
